# Supplementary material for: Study on Factors Affecting the Performance of a CRISPR/Cas-Assisted New Immunoassay: Detection of Salivary Insulin as an Example
Source: Frontiers journal article supplement (doi:10.3389/fbioe.2021.752514), 2021-11-11
Supplement: Data_Sheet_1.PDF [file Data_Sheet_1.PDF]

# Study on factors affecting the performance of a CRISPR/Cas assisted new immunoassay: detection of salivary insulin as an example

Xiaoting Lin,<sup>1</sup> Gonglei Wang,<sup>2</sup> Long Ma,<sup>3</sup> Guozhen Liu<sup>1,2\*</sup>

<sup>1</sup>Graduate School of Biomedical Engineering, University of New South Wales, Sydney NSW 2052, Australia

<sup>2</sup>School of Life and Health Sciences, The Chinese University of Hong Kong, Shenzhen 518172, P.R. China

<sup>3</sup>State Key Laboratory of Food Nutrition and Safety, Key Laboratory of Industrial Microbiology, Ministry of Education, Tianjin Key Laboratory of Industry Microbiology, National and Local United Engineering Lab of Metabolic Control Fermentation Technology, China International Science and Technology Cooperation Base of Food Nutrition/Safety and Medicinal Chemistry, College of Biotechnology, Tianjin University of Science & Technology, Tianjin, 300457, China.

## Supplementary information

**Table S1.** The sequences of ssDNA and ssRNA using in the system

| Name                        | Oligo type | Sequence 5'-3'                                                | Length (nt) | Modification         |
|-----------------------------|------------|---------------------------------------------------------------|-------------|----------------------|
| <b>Triggering ssDNA 1</b>   | ssDNA      | ACA CAA CCA CCC AAC ACA<br>ACC AAC CCC                        | 27          | 3'-biotin            |
| <b>Triggering ssDNA 2</b>   | ssDNA      | GAA GAC ACC CTA CCA ACC<br>CCC CCC ACC ACC                    | 30          | 3'-biotin            |
| <b>Guiding RNA (gRNA) 1</b> | ssRNA      | UAA UUU CUA CUA AGU GUA<br>GAU GGG GUU GGU UGU GUU<br>GGG UGG | 42          | N/A                  |
| <b>Guiding RNA (gRNA) 2</b> | ssRNA      | UAA UUU CUA CUA AGU GUA<br>GAU GGG GGG GGU UGG UAG<br>GGU GUC | 42          | N/A                  |
| <b>ssDNA reporter</b>       | ssDNA      | TTATT                                                         | 5           | 5'-Texa Red; 3'-BHQ2 |

**Table S2.** The analytes used in the system

| Name                                             | Cat. No.  | Company           |
|--------------------------------------------------|-----------|-------------------|
| <b>Recombinant human insulin</b>                 | I2643     | Sigma Aldrich     |
| <b>Recombinant human IFN-<math>\gamma</math></b> | 285-IF    | R&D Systems       |
| <b>Recombinant human IP10</b>                    | Ab9810    | Abcam             |
| <b>Recombinant IL-6</b>                          | 206-IL    | R&D Systems       |
| <b>Recombinant TNF-<math>\alpha</math></b>       | 210-TA    | R&D Systems       |
| <b>Recombinant IGF-1</b>                         | 291-G1    | R&D Systems       |
| <b>Recombinant human proinsulin C-Peptide</b>    | NBP235211 | Novus Biologicals |

**Table S3.** Antibodies used in the system

|                         | Name                                                          | Cat. No.   | Company           | Concentration ( $\mu\text{g/mL}$ ) |
|-------------------------|---------------------------------------------------------------|------------|-------------------|------------------------------------|
| <b>Capture antibody</b> | Rabbit polyclonal anti-human insulin (Pair #1)                | Ab53591    | Abcam             | 10                                 |
|                         | Rabbit polyclonal anti-human human insulin antibody (Pair #2) | NBP1-87485 | Novus Biologicals | 10                                 |

|                                             |                                                              |              |                   |      |
|---------------------------------------------|--------------------------------------------------------------|--------------|-------------------|------|
|                                             | Rabbit polyclonal anti-human insulin (biotin)                | Ab53592      | Abcam             | 10   |
| <b>Detection antibody</b><br>IgG Antibodies | Mouse monoclonal anti-human insulin (Pair #1)                | Ab6995       | Abcam             | 10   |
|                                             | Mouse monoclonal anti-human human insulin antibody (Pair #2) | NBP100-73008 | Novus Biologicals | 10   |
| <b>Antibody for probe fabrication</b>       | Goat anti-mouse IgG                                          | GTX77316     | GeneTex           | 1000 |
|                                             | Goat anti-rabbit IgG                                         | GTX77061     | GeneTex           | 1000 |

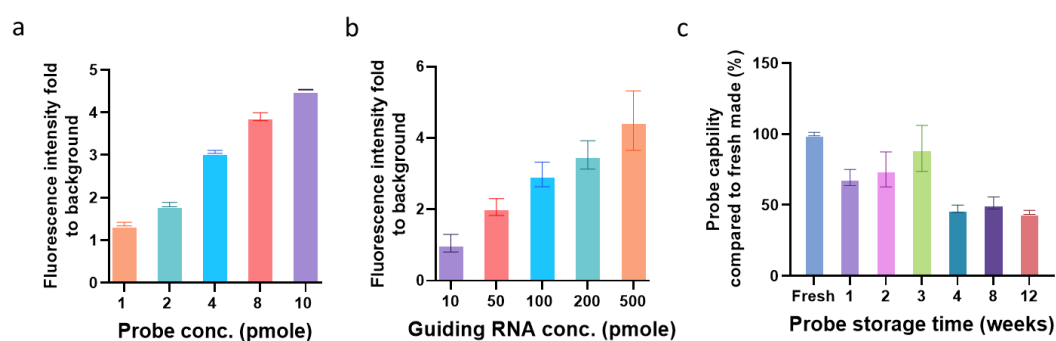

**Fig. 1S Optimisation of the concentrations of anti-IgG-ssDNA probe (a), guiding RNA (b) and assessment of anti-IgG-ssDNA probe storage time (c).**

The concentrations of the anti-IgG-ssDNA probe and guiding RNA had been optimised. With increasing the concentration, the signal levels in CANi promoted. Applied 4 pmole of the probe and 100 pmole guiding RNA in the CANi, the signal levels reached more than 3 times as the blank control indicated 4 pmole and 100 pmole could be used in the future experiment. Additionally, anti-IgG-ssDNA probe storage time was assessed. Until 12 weeks after the probe was conjugated, the signal level could still keep 50 % as the freshly made probe.

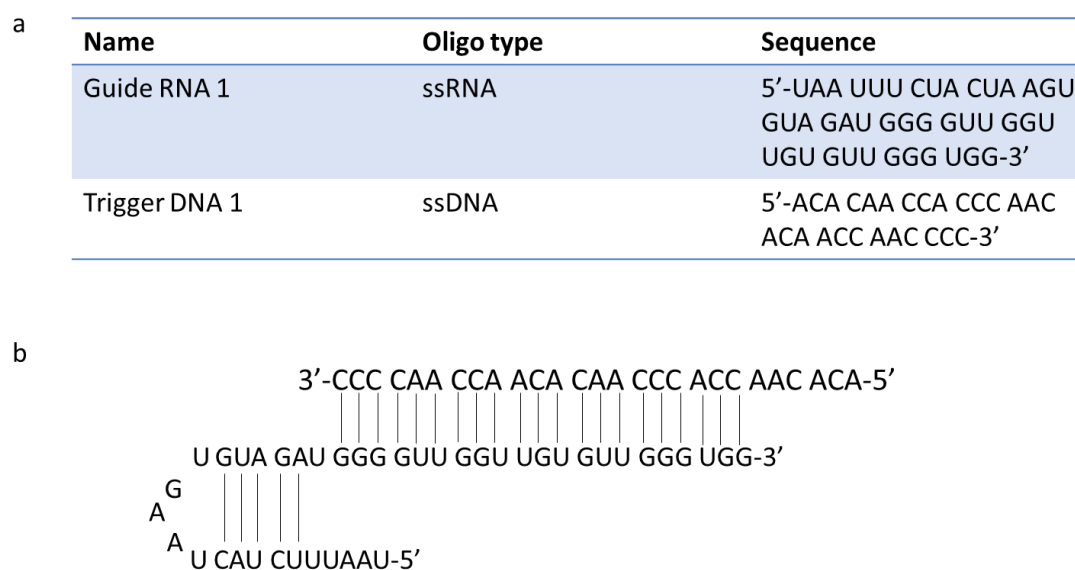

**Fig. S2** The sequences (a) and secondary structures of guide RNA 1 and Trigger DNA 1 (b).

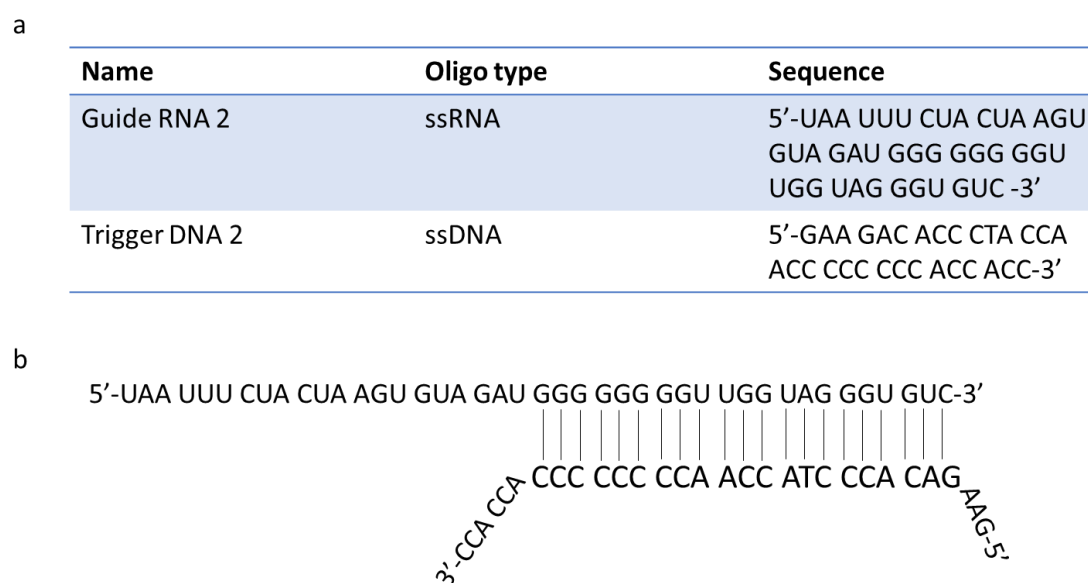

**Fig. S3** The sequences (a) and secondary structures of guide RNA 2 and Trigger DNA 2 (b).
